# Supplementary material
Source: publisher figshare collection journal article supplement (https://acs.figshare.com/ndownloader/files/4010167)
Supplement: Supplementary file 1 [file 4010167]

 
data_as-5-153 
 
_audit_creation_method            SHELXL-97 
_chemical_name_systematic 
; 
 ? 
; 
_chemical_name_common             ? 
_chemical_melting_point           ? 
_chemical_formula_moiety          ? 
_chemical_formula_sum 
 'C17 H24 Br N O2' 
_chemical_formula_weight          354.28 
 
loop_ 
 _atom_type_symbol 
 _atom_type_description 
 _atom_type_scat_dispersion_real 
 _atom_type_scat_dispersion_imag 
 _atom_type_scat_source 
 'C'  'C'   0.0033   0.0016 
 'International Tables Vol C Tables 4.2.6.8 and 6.1.1.4' 
 'H'  'H'   0.0000   0.0000 
 'International Tables Vol C Tables 4.2.6.8 and 6.1.1.4' 
 'Br'  'Br'  -0.2901   2.4595 
 'International Tables Vol C Tables 4.2.6.8 and 6.1.1.4' 
 'N'  'N'   0.0061   0.0033 
 'International Tables Vol C Tables 4.2.6.8 and 6.1.1.4' 
 'O'  'O'   0.0106   0.0060 
 'International Tables Vol C Tables 4.2.6.8 and 6.1.1.4' 
 
_symmetry_cell_setting            Monoclinic 
_symmetry_space_group_name_H-M    P21/c
 
loop_ 
 _symmetry_equiv_pos_as_xyz 
 'x, y, z' 
 '-x, y+1/2, -z+1/2' 
 '-x, -y, -z' 
 'x, -y-1/2, z-1/2' 
 
_cell_length_a                    9.858(3) 
_cell_length_b                    17.593(4) 
_cell_length_c                    10.405(3) 
_cell_angle_alpha                 90.00 
_cell_angle_beta                  100.114(2) 
_cell_angle_gamma                 90.00 
_cell_volume                      1776.6(8) 
_cell_formula_units_Z             4 
_cell_measurement_temperature     153(2) 
_cell_measurement_reflns_used     4051 
_cell_measurement_theta_min       3.0
_cell_measurement_theta_max       27.5
 
_exptl_crystal_description        prism
_exptl_crystal_colour             colorless
_exptl_crystal_size_max           0.28 
_exptl_crystal_size_mid           0.20
_exptl_crystal_size_min           0.15
_exptl_crystal_density_meas       ? 
_exptl_crystal_density_diffrn     1.325 
_exptl_crystal_density_method     'not measured' 
_exptl_crystal_F_000              736 
_exptl_absorpt_coefficient_mu     2.318 
_exptl_absorpt_correction_type    multi-scan
_exptl_absorpt_correction_T_min   0.504
_exptl_absorpt_correction_T_max   1.00
_exptl_absorpt_process_details    
;
Abscor. T. Higashi (2001). The Rigaku Corporation, Tokyo, Japan.
;
 
_exptl_special_details 
; 
 ? 
; 
 
_diffrn_ambient_temperature       153(2) 
_diffrn_radiation_wavelength      0.71075 
_diffrn_radiation_type            MoK\a 
_diffrn_radiation_source          'fine-focus sealed tube' 
_diffrn_radiation_monochromator   graphite 
_diffrn_measurement_device_type   'Rigaku SCX-Mini with Mercury 2 CCD'
_diffrn_measurement_method        \w-scans
_diffrn_detector_area_resol_mean  ? 
_diffrn_reflns_number             18681 
_diffrn_reflns_av_R_equivalents   0.0291 
_diffrn_reflns_av_sigmaI/netI     0.0247 
_diffrn_reflns_limit_h_min        -12 
_diffrn_reflns_limit_h_max        12 
_diffrn_reflns_limit_k_min        -22 
_diffrn_reflns_limit_k_max        22 
_diffrn_reflns_limit_l_min        -13 
_diffrn_reflns_limit_l_max        13 
_diffrn_reflns_theta_min          2.10 
_diffrn_reflns_theta_max          27.49 
_reflns_number_total              4080 
_reflns_number_gt                 3614 
_reflns_threshold_expression      >2sigma(I) 
 
_publ_section_references
;
Altomare A., Burla M.C., Camalli M., Cascarano G.L., Giacovazzo C., 
Guagliardi A., Moliterni A.G.G., Polidori G.,Spagna R. Sir97.  
(1999) J. Appl. Cryst. 32, 115-119.

Farrugia, L. J. (1999) J. Appl. Cryst., 32, 837-838.  An Integrated System 
of Windows Programs for the Solution, Refinement and Analysis of 
Single Crystal X-ray Diffraction Data.

Sheldrick, G. M.  (2008).  SHELXL-97.  Acta Cryst., A64, 112-122.

Spek, A. L. (1998) PLATON, A Multipurpose Crystallographic Tool, Utrecht 
University, Utrecht, The Netherlands. 
;
_publ_section_acknowledgements
;
The data were collected using instrumentation purchased with funds provided
by the National Science Foundation Grant No. 0741973.
;


_computing_data_collection              'CrystalClear (Rigaku Inc., 2008)'
_computing_cell_refinement              'CrystalClear (Rigaku Inc., 2008)'
_computing_data_reduction               'CrystalClear (Rigaku Inc., 2008)' 
                                                     
_computing_structure_solution     
;

SIR97 - Altomare A., Burla M.C., Camalli M., Cascarano G.L., Giacovazzo C., 
Guagliardi A., Moliterni A.G.G., Polidori G.,Spagna R.
;
_computing_structure_refinement   'XL SHELXTL/PC, Siemens Analytical'
_computing_molecular_graphics     'XP SHELXTL/PC, Siemens Analytical' 
_computing_publication_material   'XP SHELXTL/PC, Siemens Analytical' 


 

 


 
_refine_special_details 
; 
 Refinement of F^2^ against ALL reflections.  The weighted R-factor wR and 
 goodness of fit S are based on F^2^, conventional R-factors R are based 
 on F, with F set to zero for negative F^2^. The threshold expression of 
 F^2^ > 2sigma(F^2^) is used only for calculating R-factors(gt) etc. and is 
 not relevant to the choice of reflections for refinement.  R-factors based 
 on F^2^ are statistically about twice as large as those based on F, and R- 
 factors based on ALL data will be even larger. 
; 
 
_refine_ls_structure_factor_coef  Fsqd  
_refine_ls_matrix_type            full 
_refine_ls_weighting_scheme       calc  
_refine_ls_weighting_details 
 'calc w=1/[\s^2^(Fo^2^)+(0.0370P)^2^+0.2021P] where P=(Fo^2^+2Fc^2^)/3' 
_atom_sites_solution_primary      direct 
_atom_sites_solution_secondary    difmap 
_atom_sites_solution_hydrogens    geom 
_refine_ls_hydrogen_treatment     constr 
_refine_ls_extinction_method      none 
_refine_ls_extinction_coef        ? 
_refine_ls_number_reflns          4080 
_refine_ls_number_parameters      195 
_refine_ls_number_restraints      0 
_refine_ls_R_factor_all           0.0329 
_refine_ls_R_factor_gt            0.0280 
_refine_ls_wR_factor_ref          0.0706 
_refine_ls_wR_factor_gt           0.0683 
_refine_ls_goodness_of_fit_ref    1.070 
_refine_ls_restrained_S_all       1.070 
_refine_ls_shift/su_max           0.002 
_refine_ls_shift/su_mean          0.000 
 
loop_ 
 _atom_site_label 
 _atom_site_type_symbol 
 _atom_site_fract_x 
 _atom_site_fract_y 
 _atom_site_fract_z 
 _atom_site_U_iso_or_equiv 
 _atom_site_adp_type 
 _atom_site_occupancy 
 _atom_site_symmetry_multiplicity 
 _atom_site_calc_flag 
 _atom_site_refinement_flags 
 _atom_site_disorder_assembly 
 _atom_site_disorder_group 
C1 C 0.23191(15) 0.63116(8) 0.36382(14) 0.0229(3) Uani 1 1 d . . . 
C2 C 0.11393(15) 0.60174(9) 0.40145(15) 0.0252(3) Uani 1 1 d . . . 
C3 C 0.03923(16) 0.54249(9) 0.33552(16) 0.0309(4) Uani 1 1 d . . . 
H3 H -0.0405 0.5235 0.3644 0.037 Uiso 1 1 calc R . . 
C4 C 0.08170(18) 0.51125(9) 0.22749(17) 0.0347(4) Uani 1 1 d . . . 
H4 H 0.0319 0.4702 0.1822 0.042 Uiso 1 1 calc R . . 
C5 C 0.19698(18) 0.53995(9) 0.18551(16) 0.0330(4) Uani 1 1 d . . . 
H5 H 0.2256 0.5192 0.1103 0.040 Uiso 1 1 calc R . . 
C6 C 0.27096(17) 0.59898(9) 0.25301(15) 0.0284(3) Uani 1 1 d . . . 
H6 H 0.3501 0.6180 0.2232 0.034 Uiso 1 1 calc R . . 
C7 C 0.31191(14) 0.69709(8) 0.43425(14) 0.0221(3) Uani 1 1 d . . . 
H7 H 0.2829 0.7034 0.5210 0.026 Uiso 1 1 calc R . . 
C8 C 0.46900(14) 0.68318(9) 0.45752(14) 0.0225(3) Uani 1 1 d . . . 
H8 H 0.5004 0.6865 0.3714 0.027 Uiso 1 1 calc R . . 
C9 C 0.53842(14) 0.74717(9) 0.54445(14) 0.0232(3) Uani 1 1 d . . . 
C10 C 0.73941(17) 0.83162(9) 0.57353(16) 0.0288(3) Uani 1 1 d . . . 
C11 C 0.80719(18) 0.79728(11) 0.70305(17) 0.0384(4) Uani 1 1 d . . . 
H11A H 0.7371 0.7878 0.7573 0.058 Uiso 1 1 calc R . . 
H11B H 0.8763 0.8327 0.7483 0.058 Uiso 1 1 calc R . . 
H11C H 0.8519 0.7493 0.6871 0.058 Uiso 1 1 calc R . . 
C12 C 0.84440(19) 0.84584(10) 0.48526(19) 0.0364(4) Uani 1 1 d . . . 
H12A H 0.8927 0.7983 0.4733 0.055 Uiso 1 1 calc R . . 
H12B H 0.9111 0.8840 0.5253 0.055 Uiso 1 1 calc R . . 
H12C H 0.7971 0.8643 0.4003 0.055 Uiso 1 1 calc R . . 
C13 C 0.6598(2) 0.90418(10) 0.58981(19) 0.0398(4) Uani 1 1 d . . . 
H13A H 0.6075 0.9197 0.5050 0.060 Uiso 1 1 calc R . . 
H13B H 0.7246 0.9446 0.6242 0.060 Uiso 1 1 calc R . . 
H13C H 0.5963 0.8950 0.6507 0.060 Uiso 1 1 calc R . . 
C14 C 0.46883(19) 0.59241(10) 0.64031(17) 0.0360(4) Uani 1 1 d . . . 
H14A H 0.4906 0.5395 0.6650 0.054 Uiso 1 1 calc R . . 
H14B H 0.3698 0.6011 0.6352 0.054 Uiso 1 1 calc R . . 
H14C H 0.5205 0.6264 0.7059 0.054 Uiso 1 1 calc R . . 
C15 C 0.65174(17) 0.58984(10) 0.51577(19) 0.0375(4) Uani 1 1 d . . . 
H15A H 0.6749 0.5990 0.4293 0.056 Uiso 1 1 calc R . . 
H15B H 0.6686 0.5363 0.5395 0.056 Uiso 1 1 calc R . . 
H15C H 0.7092 0.6222 0.5802 0.056 Uiso 1 1 calc R . . 
C16 C 0.27817(16) 0.76936(9) 0.35756(15) 0.0275(3) Uani 1 1 d . . . 
H16 H 0.2991 0.7716 0.2719 0.033 Uiso 1 1 calc R . . 
C17 C 0.2216(2) 0.82960(11) 0.40158(19) 0.0414(4) Uani 1 1 d . . . 
H17A H 0.1994 0.8292 0.4868 0.050 Uiso 1 1 calc R . . 
H17B H 0.2029 0.8734 0.3481 0.050 Uiso 1 1 calc R . . 
Br1 Br 0.045316(17) 0.643802(10) 0.546320(17) 0.03383(7) Uani 1 1 d . . . 
N1 N 0.50681(14) 0.60769(7) 0.51330(13) 0.0265(3) Uani 1 1 d . . . 
O1 O 0.50178(12) 0.76785(7) 0.64378(11) 0.0325(3) Uani 1 1 d . . . 
O2 O 0.64746(10) 0.77447(6) 0.49874(10) 0.0249(2) Uani 1 1 d . . . 
 
loop_ 
 _atom_site_aniso_label 
 _atom_site_aniso_U_11 
 _atom_site_aniso_U_22 
 _atom_site_aniso_U_33 
 _atom_site_aniso_U_23 
 _atom_site_aniso_U_13 
 _atom_site_aniso_U_12 
C1 0.0213(7) 0.0237(7) 0.0221(7) 0.0026(6) -0.0002(6) 0.0012(6) 
C2 0.0225(7) 0.0248(7) 0.0278(8) 0.0048(6) 0.0025(6) 0.0036(6) 
C3 0.0245(8) 0.0260(8) 0.0403(9) 0.0046(7) 0.0007(7) -0.0027(6) 
C4 0.0352(9) 0.0252(8) 0.0394(9) -0.0026(7) -0.0058(7) -0.0029(7) 
C5 0.0388(9) 0.0291(8) 0.0299(8) -0.0047(7) 0.0028(7) 0.0018(7) 
C6 0.0282(8) 0.0304(8) 0.0266(8) -0.0006(6) 0.0045(6) -0.0014(7) 
C7 0.0205(7) 0.0252(7) 0.0210(7) -0.0004(6) 0.0047(5) -0.0005(6) 
C8 0.0217(7) 0.0242(8) 0.0217(7) 0.0002(6) 0.0040(6) -0.0023(6) 
C9 0.0221(7) 0.0250(7) 0.0224(7) 0.0020(6) 0.0037(6) -0.0015(6) 
C10 0.0274(8) 0.0273(8) 0.0314(8) -0.0034(7) 0.0043(6) -0.0086(7) 
C11 0.0329(9) 0.0458(10) 0.0331(9) -0.0032(8) -0.0037(7) -0.0097(8) 
C12 0.0310(9) 0.0377(10) 0.0420(10) -0.0032(8) 0.0102(8) -0.0123(7) 
C13 0.0458(11) 0.0276(9) 0.0477(11) -0.0063(8) 0.0126(8) -0.0052(8) 
C14 0.0393(10) 0.0358(9) 0.0323(9) 0.0103(7) 0.0046(7) 0.0010(8) 
C15 0.0277(9) 0.0349(9) 0.0491(11) 0.0003(8) 0.0046(7) 0.0068(7) 
C16 0.0286(8) 0.0272(8) 0.0263(8) 0.0010(6) 0.0036(6) -0.0010(6) 
C17 0.0511(11) 0.0344(9) 0.0374(10) -0.0003(8) 0.0043(8) 0.0120(9) 
Br1 0.02921(10) 0.03611(11) 0.03943(11) 0.00002(7) 0.01502(7) -0.00214(7) 
N1 0.0242(6) 0.0253(7) 0.0294(7) 0.0024(5) 0.0028(5) 0.0004(5) 
O1 0.0348(6) 0.0384(7) 0.0267(6) -0.0073(5) 0.0118(5) -0.0088(5) 
O2 0.0238(5) 0.0269(5) 0.0244(5) -0.0030(4) 0.0057(4) -0.0063(4) 
 
_geom_special_details 
; 
 All esds (except the esd in the dihedral angle between two l.s. planes) 
 are estimated using the full covariance matrix.  The cell esds are taken 
 into account individually in the estimation of esds in distances, angles 
 and torsion angles; correlations between esds in cell parameters are only 
 used when they are defined by crystal symmetry.  An approximate (isotropic) 
 treatment of cell esds is used for estimating esds involving l.s. planes. 
; 
 
loop_ 
 _geom_bond_atom_site_label_1 
 _geom_bond_atom_site_label_2 
 _geom_bond_distance 
 _geom_bond_site_symmetry_2 
 _geom_bond_publ_flag 
C1 C2 1.391(2) . ? 
C1 C6 1.398(2) . ? 
C1 C7 1.517(2) . ? 
C2 C3 1.386(2) . ? 
C2 Br1 1.9067(16) . ? 
C3 C4 1.381(2) . ? 
C3 H3 0.9500 . ? 
C4 C5 1.383(3) . ? 
C4 H4 0.9500 . ? 
C5 C6 1.387(2) . ? 
C5 H5 0.9500 . ? 
C6 H6 0.9500 . ? 
C7 C16 1.507(2) . ? 
C7 C8 1.544(2) . ? 
C7 H7 1.0000 . ? 
C8 N1 1.471(2) . ? 
C8 C9 1.529(2) . ? 
C8 H8 1.0000 . ? 
C9 O1 1.2092(18) . ? 
C9 O2 1.3387(17) . ? 
C10 O2 1.4801(18) . ? 
C10 C11 1.520(2) . ? 
C10 C12 1.520(2) . ? 
C10 C13 1.523(2) . ? 
C11 H11A 0.9800 . ? 
C11 H11B 0.9800 . ? 
C11 H11C 0.9800 . ? 
C12 H12A 0.9800 . ? 
C12 H12B 0.9800 . ? 
C12 H12C 0.9800 . ? 
C13 H13A 0.9800 . ? 
C13 H13B 0.9800 . ? 
C13 H13C 0.9800 . ? 
C14 N1 1.460(2) . ? 
C14 H14A 0.9800 . ? 
C14 H14B 0.9800 . ? 
C14 H14C 0.9800 . ? 
C15 N1 1.459(2) . ? 
C15 H15A 0.9800 . ? 
C15 H15B 0.9800 . ? 
C15 H15C 0.9800 . ? 
C16 C17 1.317(2) . ? 
C16 H16 0.9500 . ? 
C17 H17A 0.9500 . ? 
C17 H17B 0.9500 . ? 
 
loop_ 
 _geom_angle_atom_site_label_1 
 _geom_angle_atom_site_label_2 
 _geom_angle_atom_site_label_3 
 _geom_angle 
 _geom_angle_site_symmetry_1 
 _geom_angle_site_symmetry_3 
 _geom_angle_publ_flag 
C2 C1 C6 116.52(14) . . ? 
C2 C1 C7 122.56(14) . . ? 
C6 C1 C7 120.87(14) . . ? 
C3 C2 C1 122.57(15) . . ? 
C3 C2 Br1 116.85(12) . . ? 
C1 C2 Br1 120.56(12) . . ? 
C4 C3 C2 119.44(15) . . ? 
C4 C3 H3 120.3 . . ? 
C2 C3 H3 120.3 . . ? 
C3 C4 C5 119.70(15) . . ? 
C3 C4 H4 120.2 . . ? 
C5 C4 H4 120.2 . . ? 
C4 C5 C6 120.12(16) . . ? 
C4 C5 H5 119.9 . . ? 
C6 C5 H5 119.9 . . ? 
C5 C6 C1 121.63(15) . . ? 
C5 C6 H6 119.2 . . ? 
C1 C6 H6 119.2 . . ? 
C16 C7 C1 109.97(12) . . ? 
C16 C7 C8 109.80(12) . . ? 
C1 C7 C8 112.12(12) . . ? 
C16 C7 H7 108.3 . . ? 
C1 C7 H7 108.3 . . ? 
C8 C7 H7 108.3 . . ? 
N1 C8 C9 112.04(12) . . ? 
N1 C8 C7 112.50(12) . . ? 
C9 C8 C7 107.97(12) . . ? 
N1 C8 H8 108.1 . . ? 
C9 C8 H8 108.1 . . ? 
C7 C8 H8 108.1 . . ? 
O1 C9 O2 125.09(14) . . ? 
O1 C9 C8 123.88(13) . . ? 
O2 C9 C8 110.97(12) . . ? 
O2 C10 C11 109.23(13) . . ? 
O2 C10 C12 102.31(12) . . ? 
C11 C10 C12 111.16(15) . . ? 
O2 C10 C13 110.37(14) . . ? 
C11 C10 C13 112.91(15) . . ? 
C12 C10 C13 110.35(14) . . ? 
C10 C11 H11A 109.5 . . ? 
C10 C11 H11B 109.5 . . ? 
H11A C11 H11B 109.5 . . ? 
C10 C11 H11C 109.5 . . ? 
H11A C11 H11C 109.5 . . ? 
H11B C11 H11C 109.5 . . ? 
C10 C12 H12A 109.5 . . ? 
C10 C12 H12B 109.5 . . ? 
H12A C12 H12B 109.5 . . ? 
C10 C12 H12C 109.5 . . ? 
H12A C12 H12C 109.5 . . ? 
H12B C12 H12C 109.5 . . ? 
C10 C13 H13A 109.5 . . ? 
C10 C13 H13B 109.5 . . ? 
H13A C13 H13B 109.5 . . ? 
C10 C13 H13C 109.5 . . ? 
H13A C13 H13C 109.5 . . ? 
H13B C13 H13C 109.5 . . ? 
N1 C14 H14A 109.5 . . ? 
N1 C14 H14B 109.5 . . ? 
H14A C14 H14B 109.5 . . ? 
N1 C14 H14C 109.5 . . ? 
H14A C14 H14C 109.5 . . ? 
H14B C14 H14C 109.5 . . ? 
N1 C15 H15A 109.5 . . ? 
N1 C15 H15B 109.5 . . ? 
H15A C15 H15B 109.5 . . ? 
N1 C15 H15C 109.5 . . ? 
H15A C15 H15C 109.5 . . ? 
H15B C15 H15C 109.5 . . ? 
C17 C16 C7 124.23(16) . . ? 
C17 C16 H16 117.9 . . ? 
C7 C16 H16 117.9 . . ? 
C16 C17 H17A 120.0 . . ? 
C16 C17 H17B 120.0 . . ? 
H17A C17 H17B 120.0 . . ? 
C15 N1 C14 110.51(14) . . ? 
C15 N1 C8 112.39(12) . . ? 
C14 N1 C8 115.84(12) . . ? 
C9 O2 C10 120.84(12) . . ? 
 
loop_ 
 _geom_torsion_atom_site_label_1 
 _geom_torsion_atom_site_label_2 
 _geom_torsion_atom_site_label_3 
 _geom_torsion_atom_site_label_4 
 _geom_torsion 
 _geom_torsion_site_symmetry_1 
 _geom_torsion_site_symmetry_2 
 _geom_torsion_site_symmetry_3 
 _geom_torsion_site_symmetry_4 
 _geom_torsion_publ_flag 
C6 C1 C2 C3 1.4(2) . . . . ? 
C7 C1 C2 C3 178.68(14) . . . . ? 
C6 C1 C2 Br1 -177.20(11) . . . . ? 
C7 C1 C2 Br1 0.1(2) . . . . ? 
C1 C2 C3 C4 -0.5(2) . . . . ? 
Br1 C2 C3 C4 178.12(12) . . . . ? 
C2 C3 C4 C5 -0.8(2) . . . . ? 
C3 C4 C5 C6 1.1(2) . . . . ? 
C4 C5 C6 C1 -0.2(2) . . . . ? 
C2 C1 C6 C5 -1.0(2) . . . . ? 
C7 C1 C6 C5 -178.36(14) . . . . ? 
C2 C1 C7 C16 -101.76(16) . . . . ? 
C6 C1 C7 C16 75.42(17) . . . . ? 
C2 C1 C7 C8 135.77(14) . . . . ? 
C6 C1 C7 C8 -47.05(18) . . . . ? 
C16 C7 C8 N1 -170.86(12) . . . . ? 
C1 C7 C8 N1 -48.30(16) . . . . ? 
C16 C7 C8 C9 65.00(15) . . . . ? 
C1 C7 C8 C9 -172.44(12) . . . . ? 
N1 C8 C9 O1 -76.33(18) . . . . ? 
C7 C8 C9 O1 48.09(19) . . . . ? 
N1 C8 C9 O2 101.06(14) . . . . ? 
C7 C8 C9 O2 -134.52(12) . . . . ? 
C1 C7 C16 C17 118.87(18) . . . . ? 
C8 C7 C16 C17 -117.31(18) . . . . ? 
C9 C8 N1 C15 -67.34(16) . . . . ? 
C7 C8 N1 C15 170.80(13) . . . . ? 
C9 C8 N1 C14 61.02(16) . . . . ? 
C7 C8 N1 C14 -60.84(17) . . . . ? 
O1 C9 O2 C10 3.4(2) . . . . ? 
C8 C9 O2 C10 -173.94(12) . . . . ? 
C11 C10 O2 C9 62.76(18) . . . . ? 
C12 C10 O2 C9 -179.37(13) . . . . ? 
C13 C10 O2 C9 -61.94(18) . . . . ? 
 
_diffrn_measured_fraction_theta_max    0.999 
_diffrn_reflns_theta_full              27.49 
_diffrn_measured_fraction_theta_full   0.999 
_refine_diff_density_max    0.531 
_refine_diff_density_min   -0.469 
_refine_diff_density_rms    0.054 
